# Supplementary material for: Supramolecular [Na(15-crown-5)]+ cations anchored to face-sharing octahedral lead bromide chains featuring a rotor-like one-dimensional perovskite with a reversible isostructural phase transition near room temperature
Source: Royal Society of Chemistry journal article supplement (doi:10.1039/d1ce01273h), 2021-01-01
Supplement: d1ce01273h1.pdf [file d1ce01273h1.pdf]

Supramolecular [Na(15-crown-5)]<sup>+</sup> cations anchored to face sharing octahedral lead bromide chains featuring a rotor in a one-dimensional perovskite with a reversible isostructural phase transition near room temperature

Guo-Jun Yuan\*<sup>a</sup> Hong Zhou<sup>a</sup> Li Li<sup>a</sup> Hong Chen<sup>a</sup> Xiao-Ming Ren\*<sup>b</sup>

<sup>a</sup> Key Laboratory of Advanced Functional Materials of Nanjing, Department of Chemistry, Nanjing Xiaozhuang University, Nanjing 211171, P. R. China

<sup>b</sup> State Key Laboratory of Materials-Oriented Chemical Engineering and College of Chemistry and molecular of Engineering, Nanjing Tech University, Nanjing 211816, P. R. China

Tel.: +86 25 58139476

Email: [ahchljygj@163.com](mailto:ahchljygj@163.com); [xmren@njtech.edu.cn](mailto:xmren@njtech.edu.cn)

## Contents

Fig. S1: Simulated and experimental PXRD patterns of **1**.

Fig. S2: TG plot of **1** in 303–1068 K.

Fig. S3: (a) An asymmetric unit of **1** with non-hydrogen atom labeling (the thermal ellipsoids are drawn at 30% probability level) (b) disordered 15-crown-5 molecule (c, d) A face-sharing octahedral  $[\text{PbBr}_3]_\infty$  chain linked to supramolecular  $[\text{Na}(15\text{-crown-5})]^+$  cations viewed along  $a$ -/ $b$ -axis, respectively, in HTP at 305 K.

Fig. S4: (a) Illustration for the rotors and stators (b, c) packing diagrams of one-dimensional supramolecular rotors viewed along  $b$ - and  $c$ -axes for **1**.

Fig. S5: Variable-temperature cell Parameters in **1** between 100 and 350 K.

Fig. S6: Plots of dielectric permittivity real part versus frequency in 153–443 K for **1**.

Table S1: Crystal data and structure refinements for **1** at 100, 150, 200, 250, 315, 330 and 350 K

Table S2: Selected bond lengths (Å) for **1** in LTP at 100 K

Table S3: Selected bond lengths (Å) for **1** in LTP at 150 K

Table S4: Selected bond lengths (Å) for **1** in LTP at 200 K

Table S5: Selected bond lengths (Å) for **1** in LTP at 250 K

Table S6: Selected bond lengths (Å) for **1** in LTP at 290 K

Table S7: Selected bond lengths (Å) for **1** in HTP at 305 K

Table S8: Selected bond lengths (Å) for **1** in HTP at 315 K

Table S9: Selected bond lengths (Å) for **1** in HTP at 330 K

Table S10: Selected bond lengths (Å) for **1** in HTP at 350 K

Table S11: The parameters of  $U_{\text{eq}}$  in **1** at 100, 150, 200, 250, 290, 305, 315, 330 and 350 K

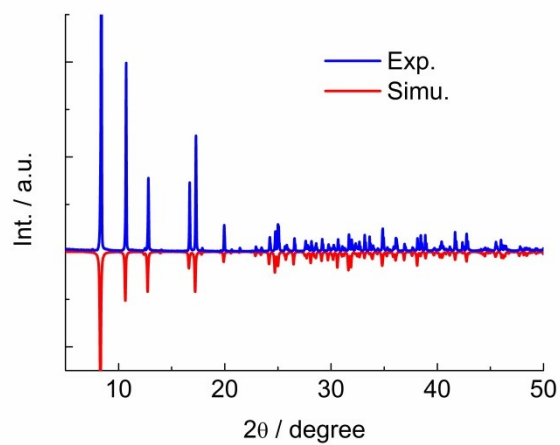

Fig. S1: Simulated and experimental PXRD patterns of **1**.

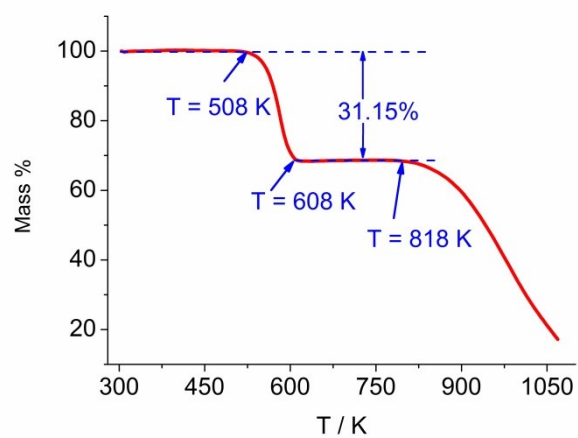

Fig. S2: TG plot of **1** in 303–1068 K.

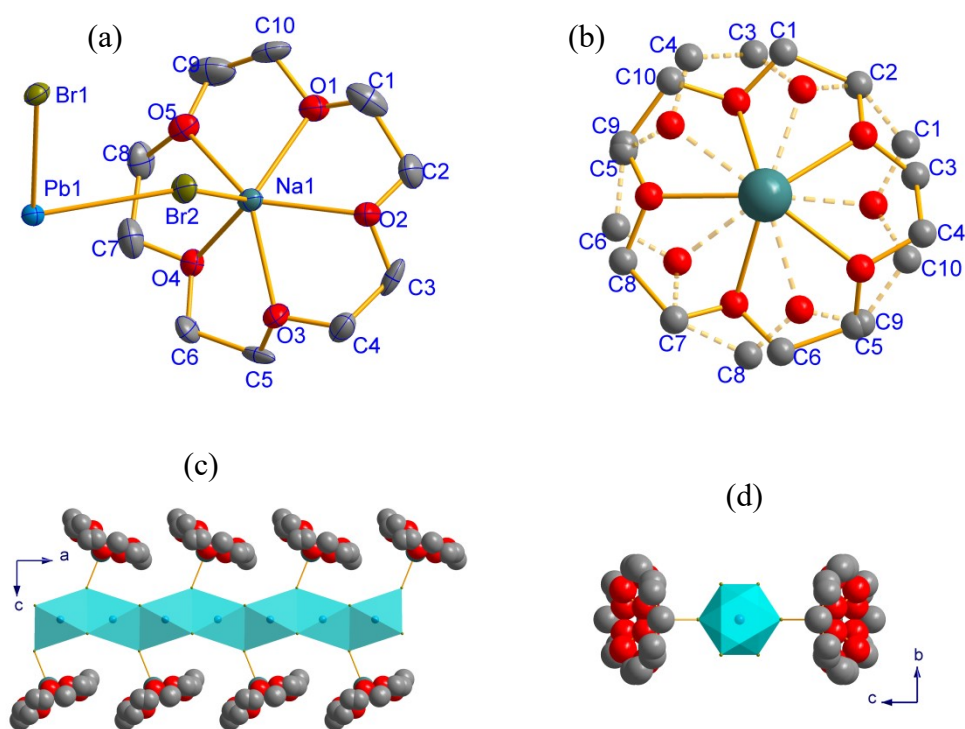

Fig. S3: (a) An asymmetric unit of **1** with non-hydrogen atom labeling (the thermal ellipsoids are drawn at 30% probability level) (b) disordered 15-crown-5 molecule (c, d) A face-sharing octahedral  $[\text{PbBr}_3]_\infty$  chain linked to supramolecular  $[\text{Na}(\text{15-crown-5})]^+$  cations viewed along  $a$ -/ $b$ -axis, respectively, in HTP at 305 K.

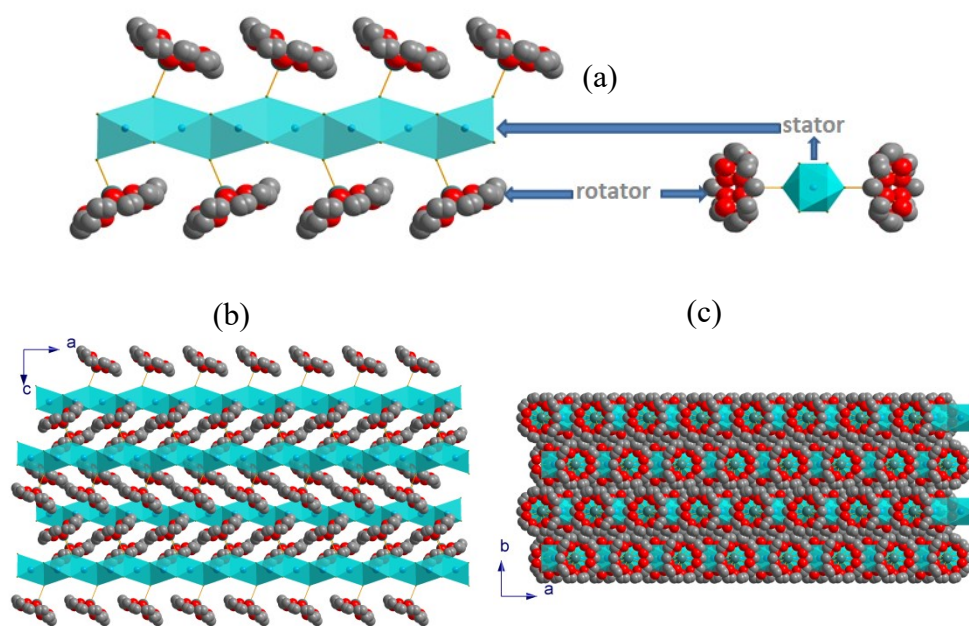

Fig. S4: (a) Illustration for the rotors and stators (b, c) packing diagrams of one-dimensional supramolecular rotors viewed along *b*- and *c*-axes for **1**.

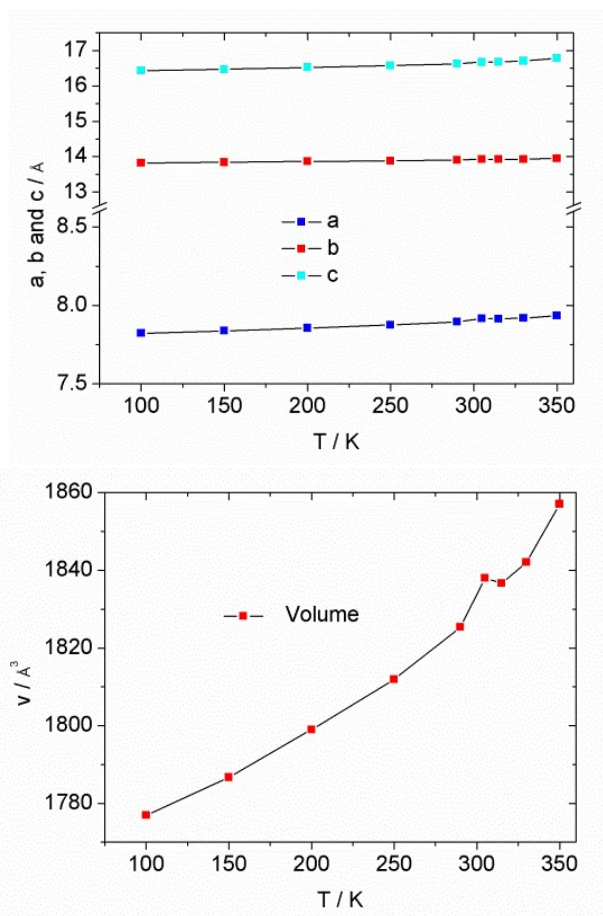

Fig. S5: Variable-temperature cell Parameters in **1** between 100 and 350 K.

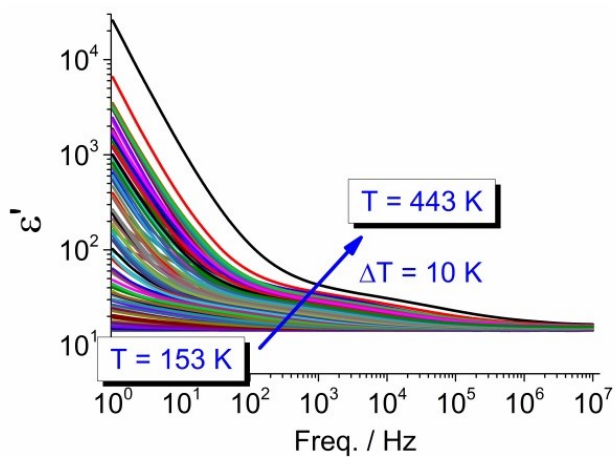

Fig. S6: Plots of dielectric permittivity real part versus frequency in 153–443 K for **1**.

Table S1: Crystal data and structure refinements for **1** at 100, 150, 200, 250, 315, 330 and 350 K

| Temp./K                                      | 100                                                                 | 150                                                                 | 200                                                                 | 250                                                                 |
|----------------------------------------------|---------------------------------------------------------------------|---------------------------------------------------------------------|---------------------------------------------------------------------|---------------------------------------------------------------------|
| Wavelength/Å                                 | 0.71073                                                             | 0.71073                                                             | 0.71073                                                             | 0.71073                                                             |
| Formula                                      | C <sub>10</sub> H <sub>20</sub> Br <sub>3</sub> NaO <sub>5</sub> Pb | C <sub>10</sub> H <sub>20</sub> Br <sub>3</sub> NaO <sub>5</sub> Pb | C <sub>10</sub> H <sub>20</sub> Br <sub>3</sub> NaO <sub>5</sub> Pb | C <sub>10</sub> H <sub>20</sub> Br <sub>3</sub> NaO <sub>5</sub> Pb |
| Formula WG                                   | 690.17                                                              | 690.17                                                              | 690.17                                                              | 690.17                                                              |
| SG                                           | Pnma                                                                | Pnma                                                                | Pnma                                                                | Pnma                                                                |
| CCDC no.                                     | 1951851                                                             | 1951853                                                             | 1951870                                                             | 2098317                                                             |
| Crystal system                               | Orthorhombic                                                        | Orthorhombic                                                        | Orthorhombic                                                        | Orthorhombic                                                        |
| a (Å)                                        | 7.8228(3)                                                           | 7.8377(3)                                                           | 7.8558(3)                                                           | 7.8755(3)                                                           |
| b (Å)                                        | 13.8222(6)                                                          | 13.8396(6)                                                          | 13.8616(5)                                                          | 13.8822(5)                                                          |
| c (Å)                                        | 16.4334(8)                                                          | 16.4718(8)                                                          | 16.5205(7)                                                          | 16.5729(7)                                                          |
| V(Å <sup>3</sup> )/Z                         | 1776.92(13)/4                                                       | 1786.71(13)/4                                                       | 1798.98(12)/4                                                       | 1811.90(12)                                                         |
| ρ (g·cm <sup>-3</sup> )                      | 2.580                                                               | 2.566                                                               | 2.548                                                               | 2.530                                                               |
| F(000)                                       | 1272                                                                | 1272                                                                | 1272                                                                | 1272                                                                |
| Abs. coeff. (mm <sup>-1</sup> )              | 16.277                                                              | 16.188                                                              | 16.077                                                              | 15.962                                                              |
| θ Ranges/°                                   | 2.48-27.55                                                          | 2.473-28.335                                                        | 2.47-28.24                                                          | 2.46-28.33                                                          |
| Index ranges                                 | -10 ≤ h ≤ 10<br>-17 ≤ k ≤ 17<br>-21 ≤ l ≤ 20                        | -10 ≤ h ≤ 10<br>-17 ≤ k ≤ 17<br>-21 ≤ l ≤ 21                        | -10 ≤ h ≤ 10<br>-17 ≤ k ≤ 17<br>-21 ≤ l ≤ 22                        | -10 ≤ h ≤ 10<br>-17 ≤ k ≤ 17<br>-21 ≤ l ≤ 22                        |
| R <sub>int</sub>                             | 0.0474                                                              | 0.0500                                                              | 0.0523                                                              | 0.0537                                                              |
| Indep. refl/<br>restr.                       | 2122/<br>158/                                                       | 2297/<br>153/                                                       | 2313/<br>158/                                                       | 2321/<br>158/                                                       |
| /para.                                       | 60                                                                  | 0                                                                   | 0                                                                   | 6                                                                   |
| Refinement method                            | The least square refinement on F <sup>2</sup>                       |                                                                     |                                                                     |                                                                     |
| Goodness of fit on<br>F <sup>2</sup>         | 1.042                                                               | 1.036                                                               | 0.992                                                               | 1.031                                                               |
| R <sub>1</sub> , wR <sub>2</sub> [I > 2σ(I)] | 0.0226<br>0.0467                                                    | 0.0258<br>0.0492                                                    | 0.0262<br>0.0507                                                    | 0.0272<br>0.0496                                                    |
| R <sub>1</sub> , wR <sub>2</sub> [all data]  | 0.0296<br>0.0487                                                    | 0.0363<br>0.0521                                                    | 0.0403<br>0.0546                                                    | 0.0474<br>0.0543                                                    |
| Residual (e·Å <sup>-3</sup> )                | 2.623/<br>-1.158                                                    | 2.355/<br>-1.602                                                    | 1.760/<br>-1.308                                                    | 1.527/<br>-1.635                                                    |

$$R_1 = \sum ||F_o| - |F_c|| / \sum |F_o|, wR_2 = [\sum w(\sum F_o^2 - F_c^2)^2 / \sum w(F_o^2)^2]^{1/2}$$

To continue Table S1

| Temp./K                                      | 315                                                                 | 330                                                                 | 350                                                                 |
|----------------------------------------------|---------------------------------------------------------------------|---------------------------------------------------------------------|---------------------------------------------------------------------|
| Wavelength/Å                                 | 0.71073                                                             | 0.71073                                                             | 0.71073                                                             |
| Formula                                      | C <sub>10</sub> H <sub>20</sub> Br <sub>3</sub> NaO <sub>5</sub> Pb | C <sub>10</sub> H <sub>20</sub> Br <sub>3</sub> NaO <sub>5</sub> Pb | C <sub>10</sub> H <sub>20</sub> Br <sub>3</sub> NaO <sub>5</sub> Pb |
| Formula WG                                   | 690.17                                                              | 690.17                                                              | 690.17                                                              |
| SG                                           | Pnma                                                                | Pnma                                                                | Pnma                                                                |
| CCDC no.                                     | 2098325                                                             | 2098430                                                             | 2098327                                                             |
| Crystal system                               | Orthorhombic                                                        | Orthorhombic                                                        | Orthorhombic                                                        |
| a (Å)                                        | 7.9139(3)                                                           | 7.9192(3)                                                           | 7.9357(3)                                                           |
| b (Å)                                        | 13.9195(6)                                                          | 13.9256(6)                                                          | 13.9514(6)                                                          |
| c (Å)                                        | 16.6734(8)                                                          | 16.7036(8)                                                          | 16.7733(8)                                                          |
| V(Å <sup>3</sup> )/Z                         | 1836.70(14)                                                         | 1842.07(14)                                                         | 1857.04(14)/4                                                       |
| ρ (g·cm <sup>-3</sup> )                      | 2.496                                                               | 2.489                                                               | 2.469                                                               |
| F(000)                                       | 1272                                                                | 1272                                                                | 1272                                                                |
| Abs. coeff. (mm <sup>-1</sup> )              | 15.747                                                              | 15.701                                                              | 15.574                                                              |
| θ Ranges/°                                   | 2.44-27.45                                                          | 2.43-27.36                                                          | 2.43-27.36                                                          |
| Index ranges                                 | -10 ≤ h ≤ 10<br>-17 ≤ k ≤ 17<br>-21 ≤ l ≤ 21                        | -10 ≤ h ≤ 10<br>-17 ≤ k ≤ 17<br>-21 ≤ l ≤ 21                        | -10 ≤ h ≤ 10<br>-17 ≤ k ≤ 17<br>-21 ≤ l ≤ 21                        |
| R <sub>int</sub>                             | 0.0592                                                              | 0.0608                                                              | 0.0604                                                              |
| Indep. refl/                                 | 2184/                                                               | 2186/                                                               | 2214/                                                               |
| restr.                                       | 158/                                                                | 158/                                                                | 158/                                                                |
| /para.                                       | 12                                                                  | 120                                                                 | 120                                                                 |
| Refinement method                            |                                                                     | The least square refinement on F <sup>2</sup>                       |                                                                     |
| Goodness of fit on F <sup>2</sup>            | 1.027                                                               | 1.038                                                               | 1.027                                                               |
| R <sub>1</sub> , wR <sub>2</sub> [I > 2σ(I)] | 0.0282<br>0.0444                                                    | 0.0314<br>0.0518                                                    | 0.0340<br>0.0543                                                    |
| R <sub>1</sub> , wR <sub>2</sub> [all data]  | 0.0536<br>0.0494                                                    | 0.0589<br>0.0577                                                    | 0.0676<br>0.0619                                                    |
| Residual (e·Å <sup>-3</sup> )                | 1.151/<br>-0.966                                                    | 1.003/<br>-0.932                                                    | 1.074/<br>-0.832                                                    |

$$R_1 = \sum ||F_o| - |F_c|| / |F_o|, wR_2 = [\sum w(\sum F_o^2 - F_c^2)^2 / \sum w(F_o^2)^2]^{1/2}$$



Table S2: Selected bond lengths (Å) for **1** in LTP at 100 K

| Bond          | Bond lengths / Å | Bond        | Bond lengths / Å |
|---------------|------------------|-------------|------------------|
| Na(1)-Br(2)   | 2.9254(18)       | Na(1)-O(1)  | 2.3853(47)       |
| Pb(1)-Br(1)   | 2.9662(3)        | Na(1)-O(1)' | 2.3853(47)       |
| Pb(1)-Br(1)#1 | 3.0568(3)        | Na(1)-O(2)  | 2.4120(46)       |
| Pb(1)-Br(1)#2 | 2.9662(3)        | Na(1)-O(2)' | 2.4120(46)       |
| Pb(1)-Br(1)#3 | 3.0568(3)        | Na(1)-O(3)  | 2.4202(42)       |
| Pb(1)-Br(2)   | 3.0921(5)        | Na(1)-O(3)' | 2.4202(42)       |
| Pb(1)-Br(2)#4 | 3.0644(5)        | Na(1)-O(4)  | 2.4438(42)       |
|               |                  | Na(1)-O(4)' | 2.4438(42)       |
|               |                  | Na(1)-O(5)  | 2.3270(45)       |
|               |                  | Na(1)-O(5)' | 2.3270(45)       |

Symmetry transformations used to generate equivalent atoms:

#1 =  $x+1/2, -y+3/2, -z+3/2$ ; #2 =  $x, -y+3/2, z$ ; #3 =  $x+1/2, y, -z+3/2$ ; #4 =  $x+1/2, -y+3/2, -z+3/2$

Table S3: Selected bond lengths (Å) for **1** in LTP at 150 K

| Bond          | Bond lengths / Å | Bond        | Bond lengths / Å |
|---------------|------------------|-------------|------------------|
| Na(1)-Br(2)   | 2.9251(20)       | Na(1)-O(1)  | 2.3887(48)       |
| Pb(1)-Br(1)   | 2.9689(3)        | Na(1)-O(1)' | 2.3887(48)       |
| Pb(1)-Br(1)#1 | 3.0577(3)        | Na(1)-O(2)  | 2.4149(58)       |
| Pb(1)-Br(1)#2 | 3.0577(3)        | Na(1)-O(2)' | 2.4149(58)       |
| Pb(1)-Br(1)#3 | 2.9689(3)        | Na(1)-O(3)  | 2.4140(42)       |
| Pb(1)-Br(2)   | 3.0950(6)        | Na(1)-O(3)' | 2.4140(42)       |
| Pb(1)-Br(2)#4 | 3.0681(6)        | Na(1)-O(4)  | 2.4389(50)       |
|               |                  | Na(1)-O(4)' | 2.4389(50)       |
|               |                  | Na(1)-O(5)  | 2.3298(48)       |
|               |                  | Na(1)-O(5)' | 2.3298(48)       |

Symmetry transformations used to generate equivalent atoms:

#1 =  $x+1/2, -y+3/2, -z+3/2$ ; #2 =  $x, -y+3/2, z$ ; #3 =  $x+1/2, y, -z+3/2$ ; #4 =  $x+1/2, -y+3/2, -z+3/2$

Table S4: Selected bond lengths (Å) for **1** in LTP at 200 K

| Bond          | Bond lengths / Å | Bond        | Bond lengths / Å |
|---------------|------------------|-------------|------------------|
| Na(1)-Br(2)   | 2.9311(20)       | Na(1)-O(1)  | 2.3992(55)       |
| Pb(1)-Br(1)   | 2.9718(3)        | Na(1)-O(1)' | 2.3992(55)       |
| Pb(1)-Br(1)#1 | 3.0587(3)        | Na(1)-O(2)  | 2.4099(62)       |
| Pb(1)-Br(1)#2 | 2.9718(3)        | Na(1)-O(2)' | 2.4099(62)       |
| Pb(1)-Br(1)#3 | 3.0587(3)        | Na(1)-O(3)  | 2.4080(42)       |
| Pb(1)-Br(2)   | 3.0961(6)        | Na(1)-O(3)' | 2.4080(42)       |
| Pb(1)-Br(2)#4 | 3.0743(6)        | Na(1)-O(4)  | 2.4477(57)       |
|               |                  | Na(1)-O(4)' | 2.4477(57)       |
|               |                  | Na(1)-O(5)  | 2.3331(48)       |
|               |                  | Na(1)-O(5)' | 2.3331(48)       |

Symmetry transformations used to generate equivalent atoms:

#1 =  $x+1/2, -y+3/2, -z+3/2$ ; #2 =  $x, -y+3/2, z$ ; #3 =  $x+1/2, y, -z+3/2$ ; #4 =  $x+1/2, -y+3/2, -z+3/2$

Table S5: Selected bond lengths (Å) for **1** in LTP at 250 K

| Bond          | Bond lengths / Å | Bond        | Bond lengths / Å |
|---------------|------------------|-------------|------------------|
| Na(1)-Br(2)   | 2.9322(21)       | Na(1)-O(1)  | 2.3953(63)       |
| Pb(1)-Br(1)   | 2.9750(4)        | Na(1)-O(1)' | 2.3953(63)       |
| Pb(1)-Br(1)#1 | 3.0594(4)        | Na(1)-O(2)  | 2.4132(67)       |
| Pb(1)-Br(1)#2 | 2.9750(4)        | Na(1)-O(2)' | 2.4132(67)       |
| Pb(1)-Br(1)#3 | 3.0594(4)        | Na(1)-O(3)  | 2.3924(56)       |
| Pb(1)-Br(2)   | 3.0937(6)        | Na(1)-O(3)' | 2.3924(56)       |
| Pb(1)-Br(2)#4 | 3.0838(6)        | Na(1)-O(4)  | 2.4331(57)       |
|               |                  | Na(1)-O(4)' | 2.4331(57)       |
|               |                  | Na(1)-O(5)  | 2.3452(59)       |
|               |                  | Na(1)-O(5)' | 2.3452(59)       |

Symmetry transformations used to generate equivalent atoms:

#1 =  $x+1/2, -y+3/2, -z+3/2$ ; #2 =  $x, -y+3/2, z$ ; #3 =  $x+1/2, y, -z+3/2$ ; #4 =  $x+1/2, -y+3/2, -z+3/2$

Table S6: Selected bond lengths (Å) for **1** in LTP at 290 K

| Bond          | Bond lengths / Å | Bond        | Bond lengths / Å |
|---------------|------------------|-------------|------------------|
| Na(1)-Br(2)   | 2.9356(24)       | Na(1)-O(1)  | 2.3982(78)       |
| Pb(1)-Br(1)   | 2.9794(5)        | Na(1)-O(1)' | 2.3982(78)       |
| Pb(1)-Br(1)#1 | 3.0595(5)        | Na(1)-O(2)  | 2.4132(79)       |
| Pb(1)-Br(1)#2 | 2.9794(5)        | Na(1)-O(2)' | 2.4132(79)       |
| Pb(1)-Br(1)#3 | 3.0595(5)        | Na(1)-O(3)  | 2.4029(70)       |
| Pb(1)-Br(2)   | 3.0865(7)        | Na(1)-O(3)' | 2.4029(70)       |
| Pb(1)-Br(2)#4 | 3.1001(7)        | Na(1)-O(4)  | 2.4317(68)       |
|               |                  | Na(1)-O(4)' | 2.4317(68)       |
|               |                  | Na(1)-O(5)  | 2.3514(67)       |
|               |                  | Na(1)-O(5)' | 2.3514(67)       |

Symmetry transformations used to generate equivalent atoms:

$$\#1 = x+1/2, -y+3/2, -z+3/2; \#2 = x, -y+3/2, z; \#3 = x+1/2, y, -z+3/2; \#4 = x+1/2, -y+3/2, -z+3/2$$

Table S7: Selected bond lengths (Å) for **1** in HTP at 305 K

| Bond          | Bond lengths / Å | Bond        | Bond lengths / Å |
|---------------|------------------|-------------|------------------|
| Na(1)-Br(2)   | 2.9434(26)       | Na(1)-O(1)  | 2.4093(78)       |
| Pb(1)-Br(1)   | 2.9848(5)        | Na(1)-O(1)' | 2.4093(78)       |
| Pb(1)-Br(1)#1 | 3.0635(5)        | Na(1)-O(2)  | 2.3977(95)       |
| Pb(1)-Br(1)#2 | 2.9848(5)        | Na(1)-O(2)' | 2.3977(95)       |
| Pb(1)-Br(1)#3 | 3.0635(5)        | Na(1)-O(3)  | 2.3805(70)       |
| Pb(1)-Br(2)   | 3.0830(7)        | Na(1)-O(3)' | 2.3805(70)       |
| Pb(1)-Br(2)#4 | 3.1145(7)        | Na(1)-O(4)  | 2.4270(75)       |
|               |                  | Na(1)-O(4)' | 2.4270(75)       |
|               |                  | Na(1)-O(5)  | 2.3726(78)       |
|               |                  | Na(1)-O(5)' | 2.3726(78)       |

Symmetry transformations used to generate equivalent atoms:

$$\#1 = x+1/2, -y+3/2, -z+3/2; \#2 = x, -y+3/2, z; \#3 = x+1/2, y, -z+3/2; \#4 = x+1/2, -y+3/2, -z+3/2$$

Table S8: Selected bond lengths (Å) for **1** in HTP at 315 K

| Bond          | Bond lengths / Å | Bond        | Bond lengths / Å |
|---------------|------------------|-------------|------------------|
| Na(1)-Br(2)   | 2.9372(26)       | Na(1)-O(1)  | 2.4290(79)       |
| Pb(1)-Br(1)   | 2.9836(5)        | Na(1)-O(1)' | 2.4290(79)       |
| Pb(1)-Br(1)#1 | 3.0601(5)        | Na(1)-O(2)  | 2.4175(99)       |
| Pb(1)-Br(1)#2 | 2.9836(5)        | Na(1)-O(2)' | 2.4175(99)       |
| Pb(1)-Br(1)#3 | 3.0601(5)        | Na(1)-O(3)  | 2.3766(70)       |
| Pb(1)-Br(2)   | 3.0774(7)        | Na(1)-O(3)' | 2.3766(70)       |
| Pb(1)-Br(2)#4 | 3.1162(7)        | Na(1)-O(4)  | 2.4306(75)       |
|               |                  | Na(1)-O(4)' | 2.4306(75)       |
|               |                  | Na(1)-O(5)  | 2.3668(78)       |
|               |                  | Na(1)-O(5)' | 2.3668(78)       |

Symmetry transformations used to generate equivalent atoms:

$$\#1 = x+1/2, -y+3/2, -z+3/2; \#2 = x, -y+3/2, z; \#3 = x+1/2, y, -z+3/2; \#4 = x+1/2, -y+3/2, -z+3/2$$

Table S9: Selected bond lengths (Å) for **1** in HTP at 330 K

| Bond          | Bond lengths / Å | Bond        | Bond lengths / Å |
|---------------|------------------|-------------|------------------|
| Na(1)-Br(2)   | 2.9366(29)       | Na(1)-O(1)  | 2.4126(94)       |
| Pb(1)-Br(1)   | 2.9837(5)        | Na(1)-O(1)' | 2.4126(94)       |
| Pb(1)-Br(1)#1 | 3.0603(5)        | Na(1)-O(2)  | 2.3720(99)       |
| Pb(1)-Br(1)#2 | 2.9837(5)        | Na(1)-O(2)' | 2.3720(99)       |
| Pb(1)-Br(1)#3 | 3.0603(5)        | Na(1)-O(3)  | 2.3746(84)       |
| Pb(1)-Br(2)   | 3.0755(9)        | Na(1)-O(3)' | 2.3746(84)       |
| Pb(1)-Br(2)#4 | 3.1197(9)        | Na(1)-O(4)  | 2.4183(75)       |
|               |                  | Na(1)-O(4)' | 2.4183(75)       |
|               |                  | Na(1)-O(5)  | 2.3677(78)       |
|               |                  | Na(1)-O(5)' | 2.3677(78)       |

Symmetry transformations used to generate equivalent atoms:

$$\#1 = x+1/2, -y+3/2, -z+3/2; \#2 = x, -y+3/2, z; \#3 = x+1/2, y, -z+3/2; \#4 = x+1/2, -y+3/2, -z+3/2$$

Table S10: Selected bond lengths (Å) for **1** in HTP at 350 K

| Bond          | Bond lengths / Å | Bond        | Bond lengths / Å |
|---------------|------------------|-------------|------------------|
| Na(1)-Br(2)   | 2.9402(33)       | Na(1)-O(1)  | 2.4156(117)      |
| Pb(1)-Br(1)   | 2.9886(6)        | Na(1)-O(1)' | 2.4156(117)      |
| Pb(1)-Br(1)#1 | 3.0651(6)        | Na(1)-O(2)  | 2.3669(116)      |
| Pb(1)-Br(1)#2 | 2.9886(6)        | Na(1)-O(2)' | 2.3669(116)      |
| Pb(1)-Br(1)#3 | 3.0651(6)        | Na(1)-O(3)  | 2.3722(98)       |
| Pb(1)-Br(2)   | 3.0793(9)        | Na(1)-O(3)' | 2.3722(98)       |
| Pb(1)-Br(2)#4 | 3.1275(9)        | Na(1)-O(4)  | 2.4287(92)       |
|               |                  | Na(1)-O(4)' | 2.4287(92)       |
|               |                  | Na(1)-O(5)  | 2.3862(102)      |
|               |                  | Na(1)-O(5)' | 2.3862(102)      |

Symmetry transformations used to generate equivalent atoms:

#1 = x+1/2, -y+3/2, -z+3/2; #2 = x, -y+3/2, z; #3 = x+1/2, y, -z+3/2; #4 = x+1/2, -y+3/2, -z+3/2

Table S11: The parameters of  $U_{eq}$  in **1** at 100, 150, 200, 250, 290, 305, 315, 330 and 350 K

| Temp. / K | 100         | 150         | 200         | 250         | 290         |
|-----------|-------------|-------------|-------------|-------------|-------------|
| Pb1       | 0.00985(8)  | 0.01465(8)  | 0.02015(8)  | 0.02640(9)  | 0.03232(9)  |
| Na1       | 0.0132(4)   | 0.0183(4)   | 0.0243(4)   | 0.0317(5)   | 0.0399(6)   |
| Br1       | 0.01526(10) | 0.02132(10) | 0.02824(11) | 0.03615(12) | 0.04353(13) |
| Br2       | 0.01506(12) | 0.02226(13) | 0.03029(14) | 0.03947(16) | 0.04769(17) |
| O1        | 0.0170(10)  | 0.0227(11)  | 0.0289(12)  | 0.0453(15)  | 0.0615(19)  |
| O2        | 0.0129(11)  | 0.0204(12)  | 0.0308(14)  | 0.0407(16)  | 0.055(2)    |
| O3        | 0.0133(10)  | 0.0173(10)  | 0.0260(12)  | 0.0372(14)  | 0.0459(16)  |
| O4        | 0.0141(10)  | 0.0193(10)  | 0.0290(12)  | 0.0363(13)  | 0.0468(16)  |
| O5        | 0.0145(10)  | 0.0214(11)  | 0.0310(12)  | 0.0437(15)  | 0.0527(17)  |
| C1        | 0.0166(16)  | 0.0227(18)  | 0.033(2)    | 0.046(3)    | 0.067(5)    |
| C2        | 0.0214(11)  | 0.0287(12)  | 0.0413(15)  | 0.0529(17)  | 0.066(2)    |
| C3        | 0.0136(14)  | 0.0206(16)  | 0.0309(19)  | 0.045(3)    | 0.061(4)    |
| C4        | 0.0144(18)  | 0.022(2)    | 0.031(2)    | 0.043(3)    | 0.063(6)    |
| C5        | 0.013(3)    | 0.013(2)    | 0.021(4)    | 0.038(5)    | 0.046(6)    |
| C6        | 0.0124(15)  | 0.023(2)    | 0.030(2)    | 0.039(3)    | 0.050(4)    |
| C7        | 0.0247(12)  | 0.0339(14)  | 0.0410(15)  | 0.0548(18)  | 0.070(2)    |
| C8        | 0.0177(17)  | 0.029(2)    | 0.037(2)    | 0.050(3)    | 0.069(5)    |
| C9        | 0.021(4)    | 0.022(4)    | 0.036(6)    | 0.043(5)    | 0.049(5)    |
| C10       | 0.0186(19)  | 0.024(2)    | 0.041(3)    | 0.056(5)    | 0.073(7)    |

To Continue Table S11

| Temp. / K | 305         | 315         | 330         | 350         |
|-----------|-------------|-------------|-------------|-------------|
| Pb1       | 0.03511(10) | 0.03693(10) | 0.03961(11) | 0.04339(13) |
| Na1       | 0.0431(6)   | 0.0461(6)   | 0.0503(7)   | 0.0550(8)   |
| Br1       | 0.04702(14) | 0.04933(14) | 0.05283(17) | 0.05791(19) |
| Br2       | 0.05152(18) | 0.05392(18) | 0.0574(2)   | 0.0629(3)   |
| O1        | 0.068(2)    | 0.072(2)    | 0.086(3)    | 0.100(4)    |
| O2        | 0.067(2)    | 0.074(3)    | 0.079(3)    | 0.093(4)    |
| O3        | 0.0558(19)  | 0.0605(19)  | 0.066(2)    | 0.072(3)    |
| O4        | 0.0517(17)  | 0.0548(17)  | 0.061(2)    | 0.071(3)    |
| O5        | 0.0571(19)  | 0.0596(19)  | 0.068(2)    | 0.077(3)    |
| C1        | 0.087(6)    | 0.134(11)   | 0.093(6)    | 0.113(8)    |
| C2        | 0.074(2)    | 0.079(2)    | 0.086(3)    | 0.097(4)    |
| C3        | 0.061(4)    | 0.079(7)    | 0.077(4)    | 0.087(5)    |
| C4        | 0.069(6)    | 0.069(4)    | 0.074(4)    | 0.089(6)    |
| C5        | 0.049(7)    | 0.080(11)   | 0.088(8)    | 0.087(9)    |
| C6        | 0.058(4)    | 0.056(4)    | 0.063(4)    | 0.068(4)    |
| C7        | 0.083(3)    | 0.088(3)    | 0.092(3)    | 0.104(4)    |
| C8        | 0.072(5)    | 0.077(6)    | 0.087(5)    | 0.091(6)    |
| C9        | 0.108(13)   | 0.085(13)   | 0.061(5)    | 0.081(8)    |
| C10       | 0.076(8)    | 0.074(6)    | 0.086(6)    | 0.095(7)    |
